# Supplementary material for: Urchin-like NiCo2O4 nanoneedles grown on mesocarbon microbeads with synergistic electrochemical properties as electrodes for symmetric supercapacitors
Source: Royal Society of Chemistry journal article supplement (doi:10.1039/c7dt01654a), 2017-01-01
Supplement: c7dt01654a1.pdf [file c7dt01654a1.pdf]

## Supporting Information

### Urchin-like $\text{NiCo}_2\text{O}_4$ Nanoneedles Grown on Mesocarbon Microbeads with Synergistic Electrochemical Properties as Electrodes for Symmetric Supercapacitors

Yu Zhang, Yihe Zhang,\* Deyang Zhang, Li Sun\*

*Beijing Key Laboratory of Materials Utilization of Nonmetallic Minerals and Solid Wastes,*

*National Laboratory of Mineral Materials, School of Materials Science and Technology, China University of Geosciences, Beijing, 100083, PR China*

\*Corresponding authors

*E-mail addresses: zyh@cugb.edu.cn (Y. Zhang), sunli@cugb.edu.cn (L. Sun)*

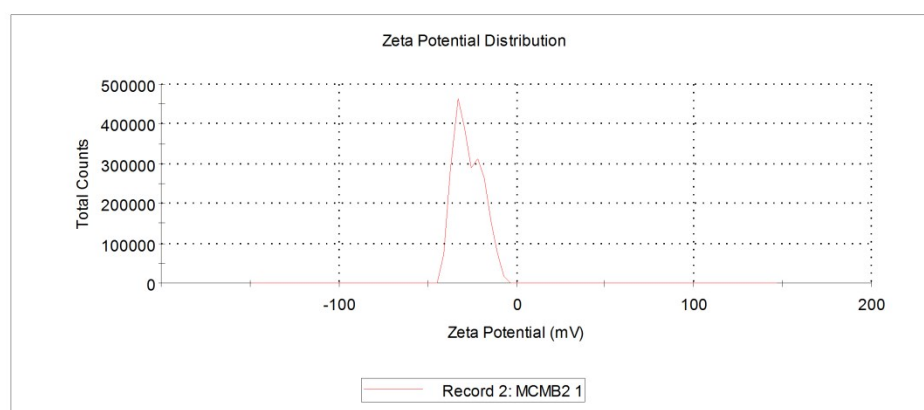

**Fig. S1.** The Zeta potential of pristine MCMB.

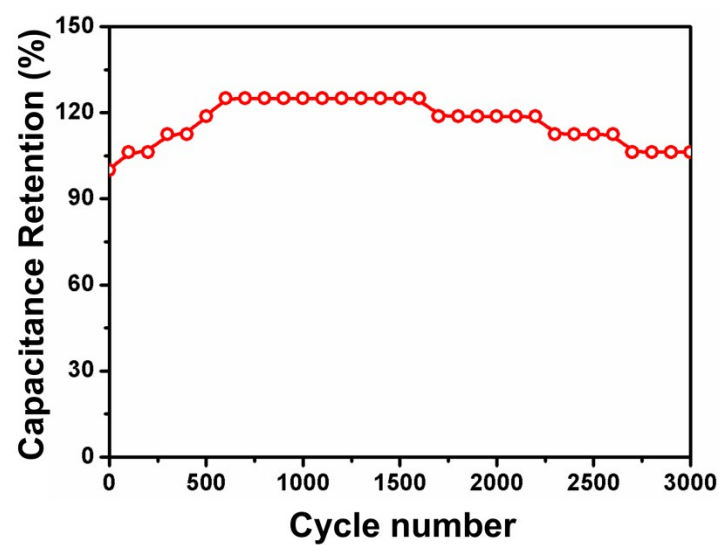

**Fig. S2.** The cycling performance of the SSC at  $1 \text{ A g}^{-1}$ .

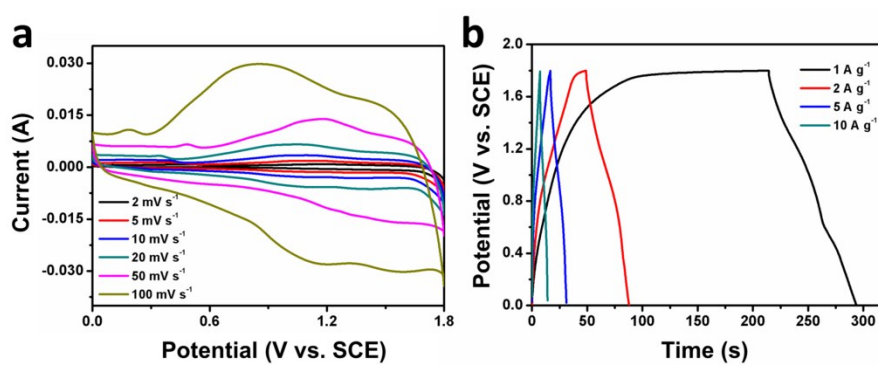

**Fig. S3.** (a) CV curves and (b) galvanostatic charging-discharging curves of the ASC device.

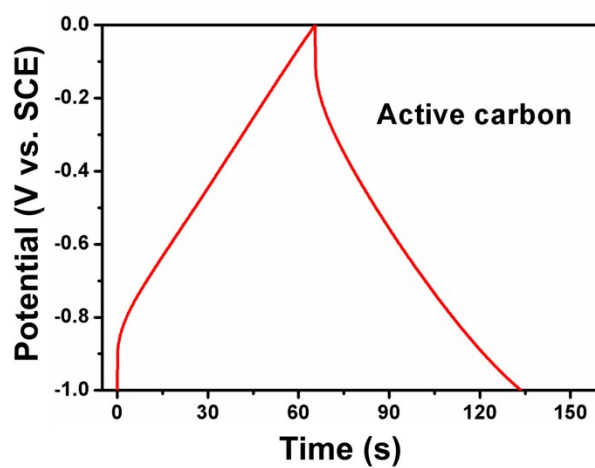

**Fig. S4.** The charging-discharging curve of active carbon at  $1 \text{ A g}^{-1}$ .
